# Supplementary material for: Length-dependent thermopower of self-assembled monolayers of alkanethiolates depends on direction of temperature gradient
Source: Royal Society of Chemistry journal article supplement (doi:10.1039/d4tc03895a), 2024-11-15
Supplement: d4tc03895a1.pdf [file d4tc03895a1.pdf]

# Supporting Information for: Length-dependent Thermopower of Self-Assembled Monolayers of Alkanethiolates Depends on Direction of Temperature Gradient

C. Lungani Mthembu<sup>1,2</sup>, and Ryan C. Chiechi<sup>\*3</sup>

<sup>1</sup>Stratingh Institute for Chemistry, University of Groningen, Nijenborgh 4, 9747 AG Groningen, the Netherlands

<sup>2</sup>Department of Chemistry, North Carolina State University, Raleigh, North Carolina 27695-8204, United States

\*e-mail: ryan.chiechi@ncsu.edu

## Contents

|                                                      |            |
|------------------------------------------------------|------------|
| <b>S1 Electrode Temperatures</b>                     | <b>S-2</b> |
| <b>S2 Alkanethiol Thermal Voltages</b>               | <b>S-3</b> |
| S2.1 Transmission and Seebeck Calculations . . . . . | S-4        |

# S1 Electrode Temperatures

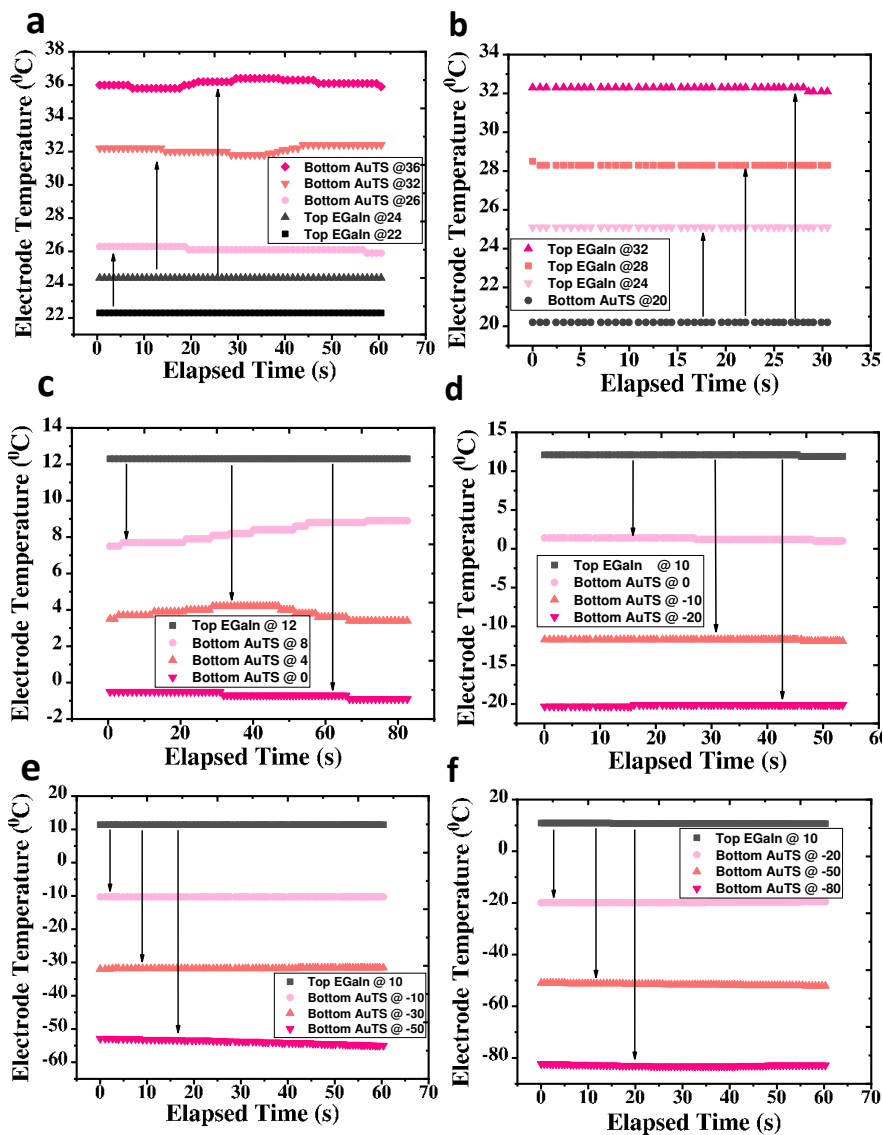

**Figure S1:** Electrode temperature plots against time (s) depicting the Au<sup>TS</sup> and EGaln temperature holds for a) positive  $\Delta T$  at ambient temperatures, b) negative  $\Delta T$  at ambient temperatures, c) negative  $\Delta T$  where EGaln is fixed at 12°C and Au<sup>TS</sup> changes 8, 4, 0°C, d) negative  $\Delta T$  where EGaln is fixed at 10°C and Au<sup>TS</sup> changes 0, -10, -20°C, e) negative  $\Delta T$  where EGaln is fixed at 10°C and Au<sup>TS</sup> changes -10, -30, -50°C, and f) negative  $\Delta T$  where EGaln is fixed at 10°C and Au<sup>TS</sup> changes -20, -50, -80°C

## S2 Alkanethiol Thermal Voltages

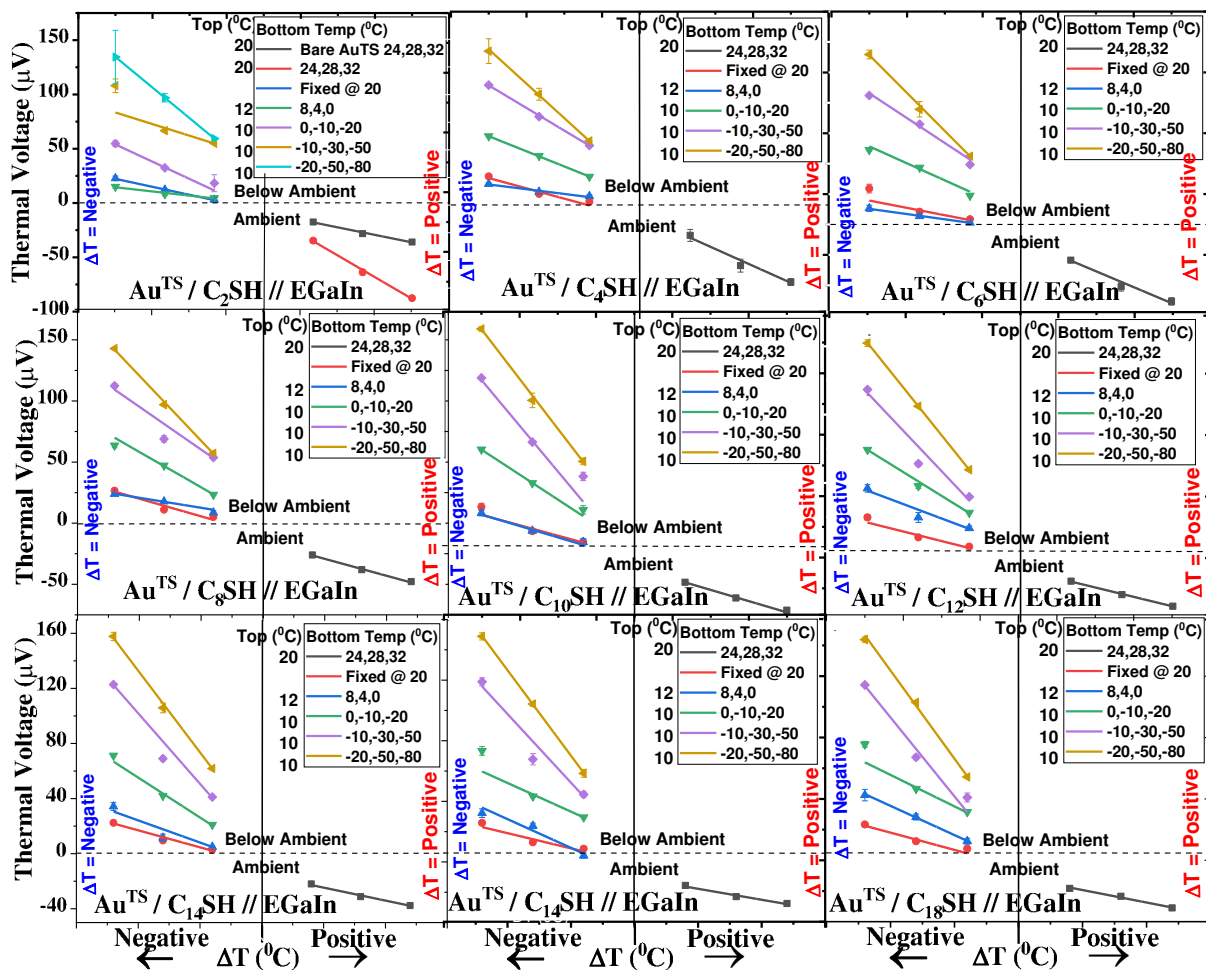

Figure S2: SCn plots of thermovoltage against different  $\Delta T$ s where the Au<sup>TS</sup> electrode temperature is above and below EGaIn electrode temperature as seen in Figure S1 (a - f)

**Table S1:** Seebeck coefficients of SCn at different  $\Delta T$ .

| $T_{\text{EGaIn}}$ ( $^{\circ}\text{C}$ ) | 20                           | (24,28,32)      | 12              | 10              | 10               | 10               |
|-------------------------------------------|------------------------------|-----------------|-----------------|-----------------|------------------|------------------|
| $T_{\text{AuTS}}$ ( $^{\circ}\text{C}$ )  | (24,28,32)                   | 20              | (0,4,8)         | (-10,-20,-30)   | (-20,-40,-60)    | (-30,-60,-90)    |
| SCn                                       | $S$ ( $\mu\text{V K}^{-1}$ ) |                 |                 |                 |                  |                  |
| $n = 2$                                   | $6.63 \pm 0.29$              | $1.79 \pm 0.36$ | $1.45 \pm 0.20$ | $3.49 \pm 0.63$ | $6.65 \pm 1.44$  | $9.19 \pm 0.01$  |
| $n = 4$                                   | $5.29 \pm 0.72$              | $1.99 \pm 0.09$ | $1.41 \pm 0.24$ | $4.57 \pm 0.05$ | $6.82 \pm 0.12$  | $10.29 \pm 0.20$ |
| $n = 6$                                   | $4.29 \pm 0.50$              | $2.00 \pm 0.91$ | $2.46 \pm 0.08$ | $4.76 \pm 0.91$ | $7.17 \pm 0.89$  | $10.47 \pm 0.23$ |
| $n = 8$                                   | $2.75 \pm 0.20$              | $2.88 \pm 0.66$ | $1.32 \pm 0.19$ | $4.95 \pm 0.45$ | $7.34 \pm 1.22$  | $10.69 \pm 0.33$ |
| $n = 10$                                  | $2.39 \pm 0.17$              | $2.37 \pm 0.71$ | $1.33 \pm 0.44$ | $5.19 \pm 0.22$ | $8.42 \pm 1.41$  | $11.34 \pm 0.24$ |
| $n = 12$                                  | $2.27 \pm 0.10$              | $2.32 \pm 0.69$ | $3.59 \pm 0.66$ | $5.75 \pm 0.18$ | $9.82 \pm 1.54$  | $11.58 \pm 0.02$ |
| $n = 14$                                  | $1.99 \pm 0.17$              | $2.47 \pm 0.36$ | $1.27 \pm 0.86$ | $6.22 \pm 0.63$ | $10.28 \pm 0.63$ | $11.97 \pm 0.37$ |
| $n = 16$                                  | $1.64 \pm 0.26$              | $3.02 \pm 0.45$ | $3.93 \pm 0.98$ | $6.12 \pm 0.88$ | $10.45 \pm 1.57$ | $12.54 \pm 0.11$ |
| $n = 18$                                  | $1.78 \pm 0.20$              | $3.10 \pm 1.37$ | $4.19 \pm 0.14$ | $6.16 \pm 0.93$ | $10.40 \pm 1.61$ | $12.57 \pm 0.14$ |

**Table S2:** Length-dependence of Seebeck coefficients.

| SCn     | $T_{\text{AuTS}}$ ( $^{\circ}\text{C}$ ) | $T_{\text{EGaIn}}$ ( $^{\circ}\text{C}$ ) | $\beta^S$ ( $\mu\text{V}/\text{Kn}$ ) |
|---------|------------------------------------------|-------------------------------------------|---------------------------------------|
| 2 – 18  | -20, -50, -80                            | 10                                        | $0.24 \pm 0.00$                       |
| 2 – 18  | -10, -30, -50                            | 10                                        | $0.32 \pm 0.05$                       |
| 2 – 18  | 0, -10, -20                              | 10                                        | $0.14 \pm 0.02$                       |
| 2 – 18  | 8, 4, 0                                  | 12                                        | $0.16 \pm 0.01$                       |
| 2 – 18  | 20                                       | 24, 28, 32                                | $0.00 \pm 0.02$                       |
| 12 – 18 | 24, 28, 32                               | 20                                        | $-0.10 \pm 0.03$                      |
| 2 – 10  | 24, 28, 32                               | 20                                        | $-0.53 \pm 0.04$                      |

## S2.1 Transmission and Seebeck Calculations

The conductance of  $\text{Au}^{\text{TS}}/\text{SCn}/\text{EGaIn}$  junctions can be approximated using a single-level Lorentzian model Eq. (S1) where  $\mathcal{T}(E)$  is the total transmission probability as a function of energy and  $\Gamma$  is the broadening, which is decreases with increasing chain-length.<sup>1</sup> This formulation assumes  $E_{\text{HOMO}}$  is closest to  $E_{\text{F}}$  and, therefore, is the major contributor to the transport level.

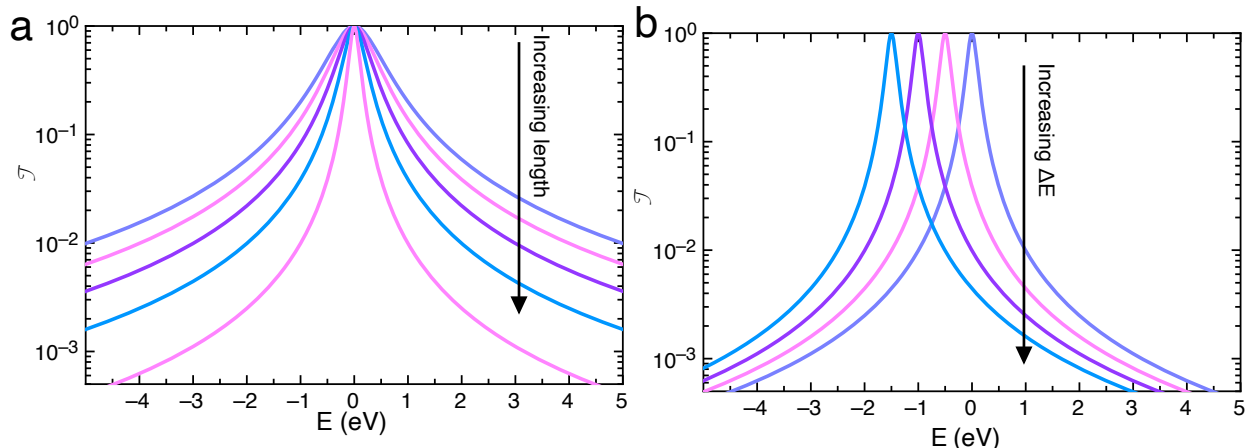

**Figure S3:** An idealized Lorentzian single-energy level zero-bias transmission probability ( $\mathcal{T}$ ) versus level alignment ( $E - E_{\text{HOMO}}$ ) illustrating how conductance decreases with increasing length by changing  $\Gamma$  (a) and how conductance decreases with increasing  $E_{\text{HOMO}}$ , *i.e.*, increasing molecular orbital gap (b).

$$\mathcal{T}(E) = \frac{\Gamma^2}{(E_{\text{HOMO}} - E)^2 - \Gamma^2} \quad (\text{S1})$$

Figure S3a is a plot of Eq. (S1) showing how a series of SCn can produce a length-dependent conductance even though  $E_{\text{HOMO}}$  does not vary with increasing length. As the alkane backbone lengthens,  $\Gamma$  decreases, causing  $\mathcal{T}$  to increase at a fixed  $E - E_{\text{HOMO}}$ . Figure S3b shows the opposite case, in which  $\Gamma$  is held constant and  $E_{\text{HOMO}}$  changes. This situation represents a series of molecules in which  $\Gamma$  does not change with length, but the frontier molecular orbital gap changes, for example a series of conjugated molecules in which the conjugation length increases with length or length is held constant and functional groups change the gap.

Equation (S1) can be combined with the Mott equation to estimate the Seebeck coef-

ficient using Eq. (S2) where  $k_B$  is the Boltzmann constant and  $e$  is elementary charge.<sup>2</sup> In a system where  $\Gamma$  and  $E_{\text{HOMO}}$  both change across a series, the dependence of  $S$  becomes more complex. Figure S4 shows plots of Eq. (S2) in which  $\Gamma$  and  $E_{\text{HOMO}}$  change across a series, with insets showing how opposite length-dependences can result depending on whether  $E_{\text{HOMO}}$  increases or decreases with  $\Gamma$ . While such behavior is expected for series of molecules in which the degree of  $\pi$ -conjugation changes with length, only  $\Gamma$  should change for alkanes because the distance between the electrodes increases, but the frontier molecular orbital energies of alkanes are independent of the length of the alkane. Adding a  $\gamma n$  term to  $E_{\text{HOMO}}$  to account for a length-dependent shift in  $E$  in Eq. (S3) mathematically yields the same behavior shown in Fig. S4 without changing  $E_{\text{HOMO}}$ . Such a shift could be induced by the voltage difference that develops in the leads when a temperature gradient is applied. Since the measured voltage of a junction is the sum of the Seebeck voltages of the leads, contacts and SAM, this voltage is subtracted from the total measured voltage to determine the Seebeck coefficient of a SAM.

$$S(E) \approx \frac{\pi^2 k_B^2 T}{3e} \frac{\partial \ln \mathcal{T}(E)}{\partial E} \quad (\text{S2})$$

$$\mathcal{T}(E) = \frac{\Gamma^2}{(n\gamma + E_{\text{HOMO}} - E)^2 + \Gamma^2} \quad (\text{S3})$$

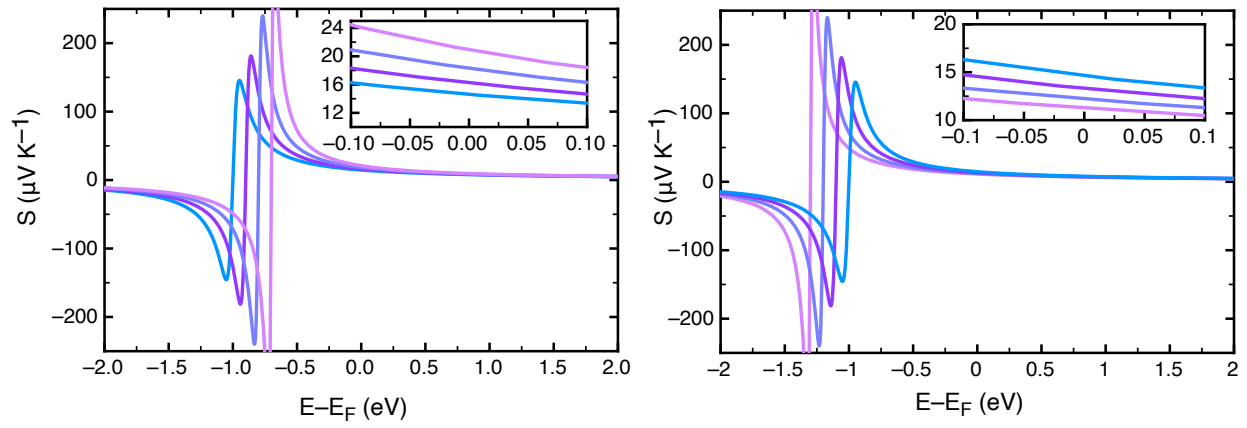

**Figure S4:** Plots of  $S$  with changing  $\Gamma$  accompanied by small shifts in  $E$ . Insets show how the direction of the length-dependence of  $S$  depends on whether  $E - E_F$  increases or decreases with  $\Gamma$ .

## References

- (1) Malen, J. A.; Yee, S. K.; Majumdar, A.; Segalman, R. A. *Chem. Phys. Lett.* **2010**, *491*, 109–122.
- (2) Paulsson, M.; Datta, S. *Phys. Rev. B* **2003**, *67*, 241403.
